# Supplementary material
Source: PubMed Central journal article supplement (PMC1074723)
Supplement: nar_33_6_1970__1.pdf [file nar_33_6_1970__1.pdf]

**Supplementary material figure1** Region of 2D watergate NOESY spectrum (recorded at 500 MHz with mixing time of 200 ms) of U5-term in  $^2\text{H}_2\text{O}$ - $\text{KH}_2\text{PO}_4/\text{Na}_2\text{HPO}_4$  buffer, pH6.6, 30°C, showing connectivities between sugar H1' protons and aromatic H6/8 protons. Lines illustrate the pathways of sequential assignments, for sake of clarity only intra-residue connectivities are labelled.

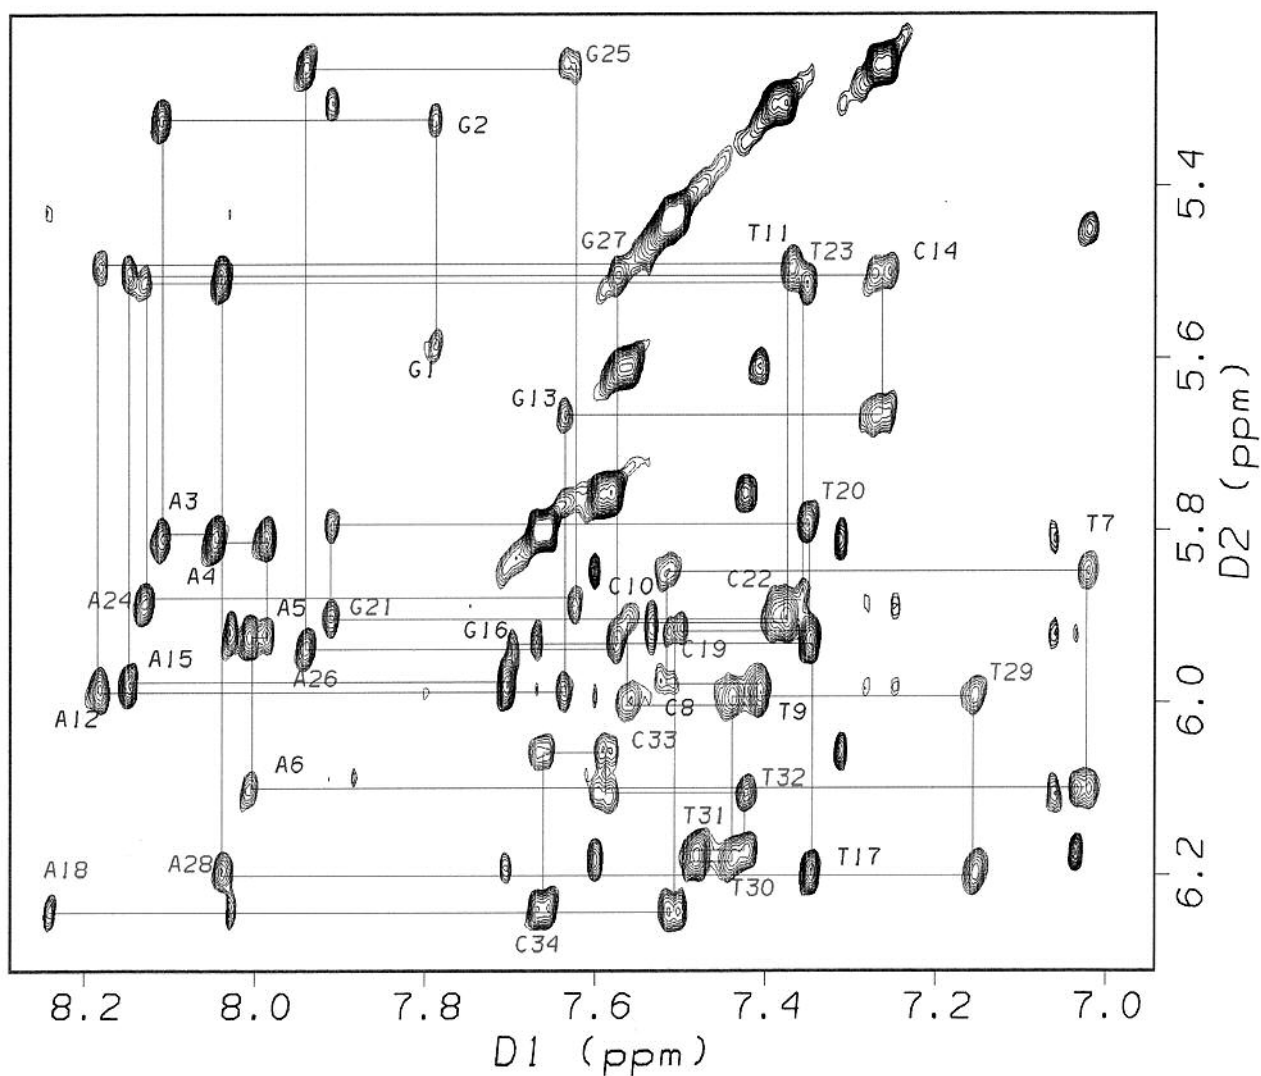

**Supplementary material Table 1** Chemical shifts of non-exchangeable protons of U5-term at 30°C (ppm from TSP)

|     | H1'  | H2'  | H2'' | H3'  | H4'  | H6/H8 | H2/CH3/H5 |
|-----|------|------|------|------|------|-------|-----------|
| G1  | 5.58 | 2.40 | 2.59 | 4.78 | 4.14 | 7.79  |           |
| G2  | 5.32 | 2.60 | 2.65 | 4.95 | 4.29 | 7.79  |           |
| A3  | 5.81 | 2.64 | 2.81 | 5.03 | 4.40 | 8.11  | 7.31      |
| A4  | 5.81 | 2.58 | 2.83 | 5.04 | 4.42 | 8.05  | 7.06      |
| A5  | 5.92 | 2.57 | 2.90 | 5.04 | 4.45 | 7.89  | 7.03      |
| A6  | 6.10 | 2.46 | 2.91 | 4.98 | 4.46 | 8.00  | 7.59      |
| T7  | 5.85 | 2.02 | 2.48 | 4.84 | 4.24 | 7.02  | 1.21      |
| C8  | 5.97 | 2.08 | 2.52 | 4.78 | 4.20 | 7.52  | 5.44      |
| T9  | 5.99 | 2.22 | 2.53 | 4.89 | 4.22 | 7.41  | 1.57      |
| C10 | 5.90 | 2.07 | 2.44 | 4.78 | 4.14 | 7.56  | 5.61      |
| T11 | 5.50 | 2.09 | 2.39 | 4.84 | 4.11 | 7.37  | 1.68      |
| A12 | 5.98 | 2.71 | 2.87 | 5.03 | 4.37 | 8.18  | 7.27      |
| G13 | 5.66 | 2.46 | 2.59 | 4.94 | 4.33 | 7.64  |           |
| C14 | 5.50 | 1.87 | 2.27 | 4.79 | 4.10 | 7.26  | 5.26      |
| A15 | 5.98 | 2.68 | 2.84 | 5.01 | 4.36 | 8.14  | 7.53      |
| G16 | 5.93 | 2.51 | 2.66 | 4.93 | 4.36 | 7.70  |           |
| T17 | 6.20 | 2.23 | 2.23 | 4.52 | 4.07 | 7.34  | 1.52      |
| A18 | 6.24 | 2.72 | 2.82 | 4.85 | 4.28 | 8.24  | 8.04      |
| C19 | 5.91 | 2.13 | 2.47 | 4.78 | 4.25 | 7.50  | 5.44      |
| T20 | 5.79 | 2.15 | 2.49 | 4.89 | 4.18 | 7.34  | 1.63      |
| G21 | 5.91 | 2.67 | 2.71 | 4.99 | 4.39 | 7.91  |           |
| C22 | 5.88 | 2.00 | 2.45 | 4.72 | 4.21 | 7.37  | 5.31      |
| T23 | 5.51 | 2.06 | 2.35 | 4.83 | 4.11 | 7.36  | 1.63      |
| A24 | 5.89 | 2.64 | 2.78 | 4.99 | 4.33 | 8.13  | 7.24      |
| G25 | 5.26 | 2.47 | 2.57 | 4.94 | 4.28 | 7.62  |           |
| A26 | 5.94 | 2.52 | 2.81 | 4.99 | 4.36 | 7.94  | 7.67      |
| G27 | 5.50 | 2.48 | 2.67 | 4.95 | 4.34 | 7.57  |           |
| A28 | 6.20 | 2.57 | 2.93 | 4.97 | 4.46 | 8.04  | 7.70      |
| T29 | 5.99 | 2.06 | 2.61 | 4.86 | 4.23 | 7.15  | 1.24      |
| T30 | 6.18 | 2.23 | 2.67 | 4.94 | 4.24 | 7.44  | 1.53      |
| T31 | 6.18 | 2.22 | 2.67 | 4.94 | 4.32 | 7.48  | 1.62      |
| T32 | 6.11 | 2.18 | 2.59 | 4.93 | 4.22 | 7.42  | 1.67      |
| C33 | 6.06 | 2.22 | 2.48 | 4.87 | 4.18 | 7.58  | 5.76      |
| C34 | 6.24 | 2.28 | 2.28 | 4.56 | 4.05 | 7.66  | 5.79      |
